# Supplementary material for: Methylation Levels in the Promoter Region of FHIT and PIAS1 Genes Associated with Mastitis Resistance in Xinjiang Brown Cattle
Source: MDPI journal article supplement (doi:10.3390/genes14061189), 2023-05-29
Supplement: s1 [file s1]

**Table S4 The information of RT-qPCR primer.**

| <b>Genes</b> | <b>Primer Sequencing</b>    | <b>Produce length/bp</b> | <b>Annealing temperature (°C)</b> |
|--------------|-----------------------------|--------------------------|-----------------------------------|
| <i>FHIT</i>  | F:AACTGTCCTTTGCCCTGGTGAAC   | 138                      | 61                                |
|              | R:CGACTCTCTGTGCTGCCTGAAAC   |                          |                                   |
| <i>PIAS1</i> | F:GCCATCTGCCAAGAGAACCTGTC   | 93                       | 60                                |
|              | R:ACTGGAGATGCTTGATGTGGAAGAC |                          |                                   |
| <i>GAPDH</i> | F:GAGATCAAGAAGGTGGTGAAGCAG  | 102                      | 58                                |
|              | R:GTAGAAGAGTGAGTGTCGCTGTTG  |                          |                                   |
