# Supplementary material for: Methylation Levels in the Promoter Region of FHIT and PIAS1 Genes Associated with Mastitis Resistance in Xinjiang Brown Cattle
Source: MDPI journal article supplement (doi:10.3390/genes14061189), 2023-05-29
Supplement: s1 [file s1]

**Table S3 The amplified conditions of PCR.**

| <b>Temperature</b> | <b>Time</b> | <b>Cycle</b> |
|--------------------|-------------|--------------|
| 95 °C              | 3 min       | 1            |
| 94 °C              | 30 s        | 40           |
| 56°C               | 30 s        |              |
| 72 °C              | 1 min       |              |
| 72 °C              | 7 min       |              |
| 4 °C               | Forever     | 1            |
