# Supplementary material for: Methylation Levels in the Promoter Region of FHIT and PIAS1 Genes Associated with Mastitis Resistance in Xinjiang Brown Cattle
Source: MDPI journal article supplement (doi:10.3390/genes14061189), 2023-05-29
Supplement: s1 [file s1]

**Table S1 Pyrosequencing primer sequences of *FHIT* and *PIAS1* genes.**

| Gene         | Primer sequence (5'→3')                          | Product size (bp) | Annealing temperature (°C) |
|--------------|--------------------------------------------------|-------------------|----------------------------|
| <i>FHIT</i>  | FH1T-F: TTGATGTTGGGAGGGATTGG                     | 212               | 59.9                       |
|              | FH1T-R (Q48, 5'-Biotin): ACTTACCCAAACTACATCTTCAA |                   |                            |
|              | FH1T-S: ATGGTTGGATGGTATTAT                       |                   |                            |
| <i>PIAS1</i> | PIAS1-F:GGAGAAAGAGGGGGAGTAATTGTTAA               | 202               | 62.2                       |
|              | PIAS1-R (Q48, 5'-Biotin):TAAACCCCCCTCTAACCAACCT  |                   |                            |
|              | PIAS1-2S: GGGGAGTAATTGTTAAATT                    |                   |                            |
