# Supplementary material for: Methylation Levels in the Promoter Region of FHIT and PIAS1 Genes Associated with Mastitis Resistance in Xinjiang Brown Cattle
Source: MDPI journal article supplement (doi:10.3390/genes14061189), 2023-05-29
Supplement: s1 [file s1]

**Table S5 The functions of candidate genes.**

| Candidate genes | Gene name                                                                    | function                                                                                                                                                                                                                                                                                           |
|-----------------|------------------------------------------------------------------------------|----------------------------------------------------------------------------------------------------------------------------------------------------------------------------------------------------------------------------------------------------------------------------------------------------|
| <i>LPCAT2</i>   | lysophosphatidylcholine acyltransferase 2                                    | It is involved in the synthesis of platelet activating factors, the production of biofilms in inflammatory cells, the synthesis of glycerol phospholipid precursors, the main components of cell membranes, key enzymes that regulate phospholipid metabolism, and the formation of lipid droplets |
| <i>MGAT5</i>    | mannosyl (alpha-1,6-)-glycoprotein beta-1,6-N-acetyl-glucosaminyltransferase | One of the most important enzymes involved in the activation of cell signaling pathways, regulation of glycoprotein-oligosaccharide biosynthesis, recombination of actin cytoskeleton, cell adhesion and cell migration                                                                            |
| <i>ZRANB3</i>   | Zinc finger RANBP2-type containing 3                                         | Involved in endonuclease activity and nucleic acid binding                                                                                                                                                                                                                                         |
| <i>ACTR3</i>    | ARP3 actin related protein 3 homolog                                         | Regulates inflammation, participates in the regulation of actin polymerization, and is a major component of the cytoskeleton                                                                                                                                                                       |
| <i>SLC37A2</i>  | solute carrier family 37 member 2                                            | Regulate the activity of transporters                                                                                                                                                                                                                                                              |
| <i>PIAS1</i>    | protein inhibitor of activated STAT 1                                        | It is involved in many cellular processes and plays a central role in transcriptional regulation of JAK-STAT and NF-kB signaling pathways                                                                                                                                                          |
| <i>FHIT</i>     | fragile histidine triad                                                      | Regulates the expression of genes critical for cell proliferation and survival, regulates SRC and AKT1 signaling pathways and induces apoptosis and tumor suppressor factors                                                                                                                       |
| <i>DYRK2</i>    | dual specificity tyrosine phosphorylation regulated kinase 2                 | Regulates the expression of genes critical for cell proliferation and survival, regulates SRC and AKT1 signaling pathways and induces apoptosis and tumor suppressor factors                                                                                                                       |
