# Supplementary material for: Methylation Levels in the Promoter Region of FHIT and PIAS1 Genes Associated with Mastitis Resistance in Xinjiang Brown Cattle
Source: MDPI journal article supplement (doi:10.3390/genes14061189), 2023-05-29
Supplement: s1 [file s1]

**Table S2 Reaction system of PCR (50  $\mu$ L).**

| <b>Component</b>                      | <b>Volume (<math>\mu</math>L)</b> |
|---------------------------------------|-----------------------------------|
| Forward primer (10 $\mu$ M) (50pM/ul) | 1.0                               |
| Reverse primer (10 $\mu$ M) (50pM/ul) | 1.0                               |
| The modified DNA                      | 2.0                               |
| 5 $\times$ buffer GC (KAPA)           | 10.0                              |
| dNTP (10mM/each)                      | 1.0                               |
| Taq enzyme (5U/ $\mu$ L)              | 0.2                               |
| dd H <sub>2</sub> O                   | 34.8                              |
