# Supplementary material for: Methylation Levels in the Promoter Region of FHIT and PIAS1 Genes Associated with Mastitis Resistance in Xinjiang Brown Cattle
Source: Genes (Basel). 2023 May 29;14(6):1189. doi: 10.3390/genes14061189 (PMC10298475; doi:10.3390/genes14061189)
Supplement: Supplementary file 1 [file genes-14-01189-s001.zip]

Archive with 5 entries (5 files):
- genes-2334215-supplementary/Additional file S1.pdf
- genes-2334215-supplementary/Additional file S2.pdf
- genes-2334215-supplementary/Additional file S3.pdf
- genes-2334215-supplementary/Additional file S4.pdf
- genes-2334215-supplementary/Additional file S5.pdf
